## Correlation analysis between molecular subtypes and Nottingham Prognostic Index in breast cancer

Hongchao Zhen<sup>1</sup>, Liuting Yang<sup>2</sup>, Li Li<sup>1</sup>, Junxian Yu<sup>3</sup>, Lei Zhao<sup>1</sup>, Yingying Li<sup>4</sup> and Qin Li<sup>1</sup>

<sup>1</sup>Department of Oncology, Beijing Friendship Hospital, Capital Medical University, Beijing, 100050, China

<sup>2</sup>Department of Biochemistry and Molecular Biology, Basic Medical College, Shanxi Medical University, Taiyuan, 030001, China

<sup>3</sup>Department of Pharmacy, Beijing Friendship Hospital, Capital Medical University, Beijing, 100050, China

<sup>4</sup>Department of Pathology and Pathophysiology, Basic Medical College, Capital Medical University, Beijing, 100069, China

**Correspondence to:** Qin Li, **email:** oncologistinbj@163.com

**Keywords:** *molecular subtypes, Nottingham Prognostic Index, breast cancer, prognosis, correlation analysis*

**Received:** October 29, 2016

**Accepted:** May 14, 2017

**Published:** May 27, 2017

Copyright: Zhen et al. This is an open-access article distributed under the terms of the Creative Commons Attribution License 3.0 (CC BY 3.0), which permits unrestricted use, distribution, and reproduction in any medium, provided the original author and source are credited.

### ABSTRACT

**Molecular subtypes and Nottingham Prognostic Index (NPI) are both prognostic models for breast cancer patients. We evaluated the association between molecular subtypes and NPI in 1042 breast cancer patients. The molecular subtypes indicating poorer prognosis were positively correlated to higher NPI ( $r = 0.138$ ,  $P = 0.001$ ). ER positive expression and PR high expression were positively correlated with NPI ( $r = 0.142$ ,  $P = 0.001$ ;  $r = 0.139$ ,  $P = 0.001$ ; respectively) and negatively correlated with histological grade ( $r = -0.233$ ,  $P < 0.001$ ;  $r = -0.176$ ,  $P < 0.001$ ; respectively). Ki67 status was negatively correlated with NPI and positively correlated with histological grade ( $r = -0.120$ ,  $P = 0.004$ ;  $r = 0.197$ ,  $P < 0.001$ ; respectively). The percentages of cases with NPI score 2.00–3.40 were higher in the luminal A, ER+, PR high expression and Ki67 low expression group, and the percentages of cases with NPI > 5.40 were higher in the HER2 overexpression subtype, basal-like subtype, ER-, PR low/negative expression, and Ki67 high expression groups. The excellent consistence was observed between histological grade and molecular subtypes, ER, PR, Ki67. The difference of histological grade between the HER2 positive and negative group was statistically significant. In conclusion, there was closely association between molecular subtypes and NPI in breast cancer. For further comparing the prognostic significance of molecular subtypes and NPI, survival analyses should be performed on the same population in a large-scale prospective study.**

### INTRODUCTION

Breast cancer is the most common malignant tumor in women around the world, comprising 25% of all cancer cases in women [1]. Because of its high morbidity, breast cancer seriously affects women's health and life quality. At present, surgical resection is the main treatment strategy for patients with breast cancer. Adjuvant chemotherapy, endocrine therapy, radiation therapy, targeted therapy and other comprehensive treatments have also significantly improved disease free survival and overall survival. However, postoperative recurrence and metastasis are still

big problems plagued the clinicians and patients. Thus, there is an urgent need to establish effective models for evaluating prognosis of breast cancer.

The Nottingham Prognostic Index (NPI) established in 1982 is a widely used clinicopathological score system for primary breast cancer prognostication [2]. The NPI combines nodal status, tumor size and histological grade in a simple formula. It stratifies breast cancer patients into three prognostic groups: good, moderate and poor [3]. The NPI could guide individualized therapeutic decision for breast cancer by providing risk stratification. Its advantages of prognosis stratification have been

confirmed by various studies, and it has been widely used in clinical practice [4–6]. However, the NPI does not address biological and molecular characteristics of breast cancer.

In recent years, prognostic significance of gene expression has become the research hotspot. For example, the 21-gene recurrence score, 70-gene signature and TP53 mutation-correlated genes were verified to have prognostic value in different breast cancer populations [7–9]. However, the expensive cost of the multi-gene assays and the lack of verifiable trials prohibit them for clinical application in many countries [10]. So the experts propose utilizing routinely pathological parameters to replace gene detection in clinical practice. In 2013, the St Gallen Consensus Conference and ESMO Clinical Practice Guidelines recommended surrogate definitions of intrinsic molecular subtypes of breast cancer [11]. According to the expression of estrogen receptor (ER), progesterone receptor (PR), human epidermal growth factor receptor 2

(HER2) expression/amplification and Ki67, breast cancer is classified into four molecular subtypes including luminal A, luminal B, HER2 overexpression and the basal-like subtype. Endocrine therapy is generally effective for patients with the luminal A subtype, and this type shows the best outcome [12]. Luminal B subtype, determined by the status of Ki67 and HER2, appear obvious distinction from luminal A [13, 14]. Luminal B shows poorer prognosis compared with luminal A [15, 16]. Whereas, HER2 overexpression subtype and basal-like subtype are associated with a higher risk of recurrence and present the worse outcome [17–20].

In this study, we evaluated the correlation and inherent links between the molecular subtypes and NPI in breast cancer, with the aim to further understand and find the best prediction model in breast cancer. We also analyze the relationships among the sub-factors in two models.

## RESULTS

### Correlation analysis of different variables between molecular subtypes and NPI

Spearman correlation analysis was used to calculate the correlation of different variables in molecular subtypes and NPI. The analysis confirmed a significant positive correlation between molecular subtypes and NPI. The molecular subtypes indicating poorer prognosis were positively correlated to higher NPI ( $r = 0.138$ ,  $P = 0.001$ ). ER positive expression and PR high expression were positively correlated with NPI ( $r = 0.142$ ,  $P = 0.001$ ;  $r = 0.139$ ,  $P = 0.001$ ; respectively) and negatively correlated with histological grade ( $r = -0.233$ ,  $P < 0.001$ ;  $r = -0.176$ ,  $P < 0.001$ ; respectively). Ki67 status was negatively correlated with NPI and positively correlated with histological grade ( $r = -0.120$ ,  $P = 0.004$ ;  $r = 0.197$ ,  $P < 0.001$ ; respectively). HER2 status had no significant

association with NPI and its components including tumor size, lymph node staging and histological grade. (Table 1)

### Cross analysis between molecular subtypes and NPI

The distribution percentages of NPI scores and its components in the molecular subtypes are shown in Table 2 and Figure 1. The percentages were luminal A > luminal B > HER2 overexpression or basal-like in the NPI 2.00–3.40 group, whereas, the percentages were luminal A < luminal B < HER2 overexpression or basal-like in the NPI > 5.40 group. The percentages were luminal A < luminal B < HER2 overexpression < basal-like in the high histological grade group, whereas, the percentages were luminal A > luminal B > HER2 overexpression > basal-like in the low histological grade group. The differences of the histological grade in the four molecular subtypes were statistically significant ( $P < 0.001$ ). However, there are no significant differences of tumor size or lymph nodes in the four molecular subtypes. Luminal B subtype included HER2 negative and HER2 positive subgroups, and there was no difference of NPI score between two subgroups ( $P = 0.305$ ). However, the difference of NPI score between HER2+/ER+ and HER2+/ER- subtypes was statistically significant ( $P = 0.038$ ).

### Cross analysis of ER status and NPI

The percentage of cases with NPI score 2.00–3.40 in the ER+ group was significantly higher than that in the ER- group, the percentage of cases with NPI score > 5.40 in the ER- group was nearly 2.0 fold than that in ER+ group, and the difference of NPI score between the two groups was statistically significant ( $P = 0.002$ ). The opposite trends were observed regarding histological grade and ER status. There were no significant differences of tumor size or lymph nodes between ER+ and ER- groups. (Table 3 and Figure 1)

### Cross analysis of PR status and NPI

The relationship between NPI scores and PR status was shown in Table 4 and Figure 1. These results were similar to the relationship between NPI scores and ER status. The percentage of cases with NPI score 2.00–3.40 in the PR high expression group was higher compared with that of PR low expression and negative group. The percentage of cases with NPI score > 5.40 in the PR low expression and negative groups was significant higher than that in the PR high expression group, and the difference of NPI score among the three groups was statistically significant ( $P < 0.001$ ). The percentage of cases with high histological grade in the PR high expression group was significant lower than that in the PR low expression and negative group. However, these significant trends were not observed in tumor size and lymph nodes staging among different PR groups.

**Table 1: Correlation analysis of different variables between molecular subtypes and Nottingham Prognostic Index (NPI)**

|                           |                | NPI score | Grade  | Tumor  | Node   |
|---------------------------|----------------|-----------|--------|--------|--------|
| <b>Molecular subtypes</b> | <i>r</i>       | 0.138     | -0.212 | 0.005  | -0.026 |
|                           | <i>P</i> value | 0.001     | 0.000  | 0.891  | 0.540  |
| <b>ER</b>                 | <i>r</i>       | 0.142     | -0.233 | 0.027  | -0.041 |
|                           | <i>P</i> value | 0.001     | 0.000  | 0.471  | 0.330  |
| <b>PR</b>                 | <i>r</i>       | 0.139     | -0.176 | 0.056  | -0.024 |
|                           | <i>P</i> value | 0.001     | 0.000  | 0.132  | 0.567  |
| <b>HER2</b>               | <i>r</i>       | 0.000     | 0.063  | 0.023  | 0.003  |
|                           | <i>P</i> value | 0.999     | 0.141  | 0.553  | 0.944  |
| <b>Ki67</b>               | <i>r</i>       | -0.120    | 0.197  | -0.059 | -0.012 |
|                           | <i>P</i> value | 0.004     | 0.000  | 0.119  | 0.779  |

**Cross analysis of HER2 status and NPI**

In the retrospective study, our results showed that HER2 status was closely related to the histological grade. The percentage of cases with low histological grade in the HER2+ group was significant lower than that in the HER2- group. However, there were no significant distribution differences of NPI, tumor size and lymph nodes staging between HER2+ and HER2- groups. (Table 5 and Figure 1)

**Cross analysis of Ki67 status and NPI**

We found that the percentage of cases with NPI score 2.00–3.40 was elevated in the Ki67 low expression group compared with that of the Ki67 high expression group, the percentage of cases with NPI score 3.41–5.40 was lower in the Ki67 low expression group than that in the Ki67 high expression. The difference of NPI scores and histological grade between the two groups were

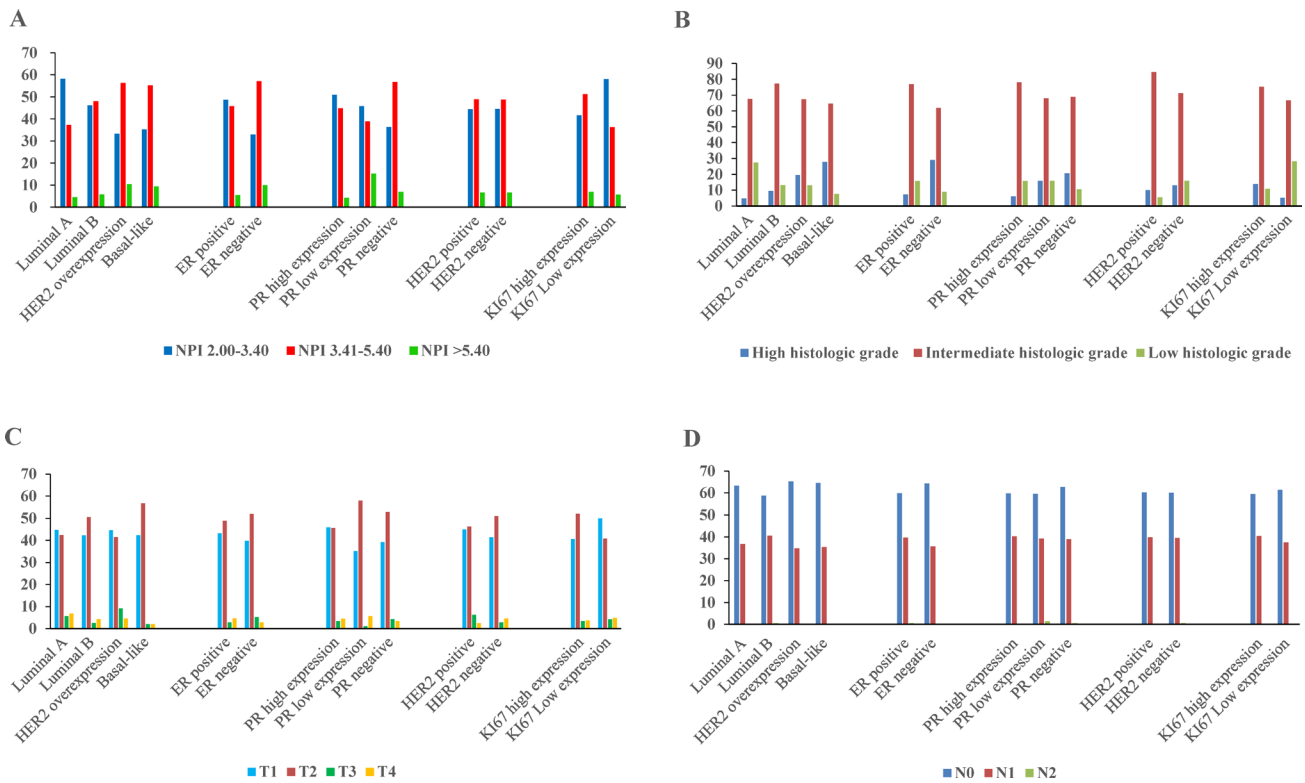

**Figure 1: The distribution of NPI variables in molecular subtypes and its sub-factors. (A)** The proportion of NPI scores in molecular subtypes and its sub-factors. **(B)** The proportion of histological grades in molecular subtypes and its sub-factors. **(C)** The proportion of tumor sizes in molecular subtypes and its sub-factors. **(D)** The proportion of lymph nodes in molecular subtypes and its sub-factors.

**Table 2: Cross analysis between molecular subtypes and Nottingham Prognostic Index (NPI)**

|                                 | Luminal A<br><i>n</i> (%) | Luminal B<br><i>n</i> (%) | HER2<br>overexpression<br><i>n</i> (%) | Basal-like<br><i>n</i> (%) | <i>X</i> <sup>2</sup> | <i>P</i> |
|---------------------------------|---------------------------|---------------------------|----------------------------------------|----------------------------|-----------------------|----------|
| <b>NPI score</b>                |                           |                           |                                        |                            | 12.051                | 0.061    |
| 2.00–3.40                       | 39 (58.2)                 | 183 (46.2)                | 16 (33.3)                              | 30 (35.3)                  |                       |          |
| 3.41–5.40                       | 25 (37.3)                 | 190 (48.0)                | 27 (56.3)                              | 47 (55.3)                  |                       |          |
| > 5.40                          | 3 (4.5)                   | 23 (5.8)                  | 5 (10.4)                               | 8 (9.4)                    |                       |          |
| <b>Grade</b>                    |                           |                           |                                        |                            | 35.240                | 0.000    |
| High histological grade         | 3 (4.8)                   | 36 (9.5)                  | 9 (19.6)                               | 22 (27.8)                  |                       |          |
| Intermediate histological grade | 42 (67.7)                 | 293 (77.3)                | 31 (67.4)                              | 51 (64.6)                  |                       |          |
| Low histological grade          | 17 (27.5)                 | 50 (13.2)                 | 6 (13.0)                               | 6 (7.6)                    |                       |          |
| <b>Tumor size</b>               |                           |                           |                                        |                            | 15.409                | 0.220    |
| T1                              | 39 (44.8)                 | 198 (42.4)                | 29 (44.6)                              | 38 (39.1)                  |                       |          |
| T2                              | 37 (42.6)                 | 237 (50.6)                | 27 (41.5)                              | 55 (56.7)                  |                       |          |
| T3                              | 5 (5.7)                   | 12 (2.7)                  | 6 (9.3)                                | 2 (2.1)                    |                       |          |
| T4                              | 6 (6.9)                   | 20 (4.3)                  | 3 (4.6)                                | 2 (2.1)                    |                       |          |
| <b>Lymph nodes</b>              |                           |                           |                                        |                            | 2.432                 | 0.876    |
| N0                              | 38 (63.3)                 | 220 (58.8)                | 30 (65.2)                              | 51 (64.6)                  |                       |          |
| N1                              | 22 (36.7)                 | 152 (40.7)                | 16 (34.8)                              | 28 (35.4)                  |                       |          |
| N2                              | 0 (0.0)                   | 2 (0.5)                   | 0 (0.0)                                | 0 (0.0)                    |                       |          |

**Table 3: Relationship between ER status and Nottingham Prognostic Index (NPI)**

|                                 | ER positive<br><i>n</i> (%) | ER negative<br><i>n</i> (%) | <i>X</i> <sup>2</sup> | <i>P</i> |
|---------------------------------|-----------------------------|-----------------------------|-----------------------|----------|
| <b>NPI score</b>                |                             |                             | 12.081                | 0.002    |
| 2.00–3.40                       | 221 (48.7)                  | 46 (32.9)                   |                       |          |
| 3.41–5.40                       | 208 (45.8)                  | 80 (57.1)                   |                       |          |
| > 5.40                          | 25 (5.5)                    | 14 (10.0)                   |                       |          |
| <b>Grade</b>                    |                             |                             | 44.816                | 0.000    |
| High histological grade         | 32 (7.4)                    | 39 (29.1)                   |                       |          |
| Intermediate histological grade | 332 (76.9)                  | 83 (61.9)                   |                       |          |
| Low histological grade          | 68 (15.7)                   | 12 (9.0)                    |                       |          |
| <b>Tumor size</b>               |                             |                             | 4.019                 | 0.403    |
| T1                              | 238 (43.4)                  | 68 (39.8)                   |                       |          |
| T2                              | 269 (48.9)                  | 89 (52.0)                   |                       |          |
| T3                              | 16 (2.9)                    | 9 (5.3)                     |                       |          |
| T4                              | 26 (4.8)                    | 5 (2.9)                     |                       |          |
| <b>Lymph nodes</b>              |                             |                             | 1.405                 | 0.495    |
| N0                              | 256 (59.8)                  | 85 (64.4)                   |                       |          |
| N1                              | 170 (39.7)                  | 47 (35.6)                   |                       |          |
| N2                              | 2 (0.5)                     | 0 (0.0)                     |                       |          |

**Table 4: Relationship between PR status and Nottingham Prognostic Index (NPI)**

|                                 | PR high expression<br><i>n</i> (%) | PR low expression<br><i>n</i> (%) | PR negative<br><i>n</i> (%) | $\chi^2$ | <i>P</i> |
|---------------------------------|------------------------------------|-----------------------------------|-----------------------------|----------|----------|
| <b>NPI score</b>                |                                    |                                   |                             | 22.319   | 0.000    |
| 2.00–3.40                       | 157 (51.0)                         | 33 (45.8)                         | 78 (36.3)                   |          |          |
| 3.41–5.40                       | 138 (44.8)                         | 28 (38.9)                         | 122 (56.7)                  |          |          |
| > 5.40                          | 13 (4.2)                           | 11 (15.3)                         | 15 (7.0)                    |          |          |
| <b>Grade</b>                    |                                    |                                   |                             | 25.441   | 0.000    |
| High histological grade         | 18 (6.1)                           | 11 (15.9)                         | 41 (20.6)                   |          |          |
| Intermediate histological grade | 232 (78.1)                         | 47 (68.2)                         | 137 (68.8)                  |          |          |
| Low histological grade          | 47 (15.8)                          | 11 (15.9)                         | 21 (10.6)                   |          |          |
| <b>Tumor size</b>               |                                    |                                   |                             | 9.326    | 0.316    |
| T1                              | 172 (46.1)                         | 31 (35.2)                         | 101 (39.3)                  |          |          |
| T2                              | 171 (45.8)                         | 51 (58.0)                         | 136 (52.9)                  |          |          |
| T3                              | 13 (3.5)                           | 1 (1.1)                           | 11 (4.3)                    |          |          |
| T4                              | 17 (4.6)                           | 5 (5.7)                           | 9 (3.5)                     |          |          |
| <b>Lymph nodes</b>              |                                    |                                   |                             | 3.718    | 0.446    |
| N0                              | 169 (59.7)                         | 44 (59.5)                         | 126 (62.7)                  |          |          |
| N1                              | 114 (40.3)                         | 29 (39.2)                         | 74 (36.8)                   |          |          |
| N2                              | 0 (0)                              | 1 (1.3)                           | 1 (0.5)                     |          |          |

**Table 5: Relationship between HER2 status and Nottingham Prognostic Index (NPI)**

|                                 | HER2 positive<br><i>n</i> (%) | HER2 negative<br><i>n</i> (%) | $\chi^2$ | <i>P</i> |
|---------------------------------|-------------------------------|-------------------------------|----------|----------|
| <b>NPI score</b>                |                               |                               | 0.001    | 0.999    |
| 2.00–3.40                       | 60 (44.4)                     | 198 (44.5)                    |          |          |
| 3.41–5.40                       | 66 (48.9)                     | 217 (48.8)                    |          |          |
| > 5.40                          | 9 (6.7)                       | 30 (6.7)                      |          |          |
| <b>Grade</b>                    |                               |                               | 11.351   | 0.003    |
| High histological grade         | 13 (10.0)                     | 55 (13.0)                     |          |          |
| Intermediate histological grade | 110 (84.6)                    | 300 (71.1)                    |          |          |
| Low histological grade          | 7 (5.4)                       | 67 (15.9)                     |          |          |
| <b>Tumor size</b>               |                               |                               | 6.055    | 0.109    |
| T1                              | 72 (45.0)                     | 217 (41.4)                    |          |          |
| T2                              | 74 (46.2)                     | 267 (51.1)                    |          |          |
| T3                              | 10 (6.3)                      | 15 (2.9)                      |          |          |
| T4                              | 4 (2.5)                       | 24 (4.6)                      |          |          |
| <b>Lymph nodes</b>              |                               |                               | 0.588    | 0.745    |
| N0                              | 74 (60.2)                     | 252 (60.0)                    |          |          |
| N1                              | 49 (39.8)                     | 166 (39.5)                    |          |          |
| N2                              | 0 (0.0)                       | 2 (0.5)                       |          |          |

**Table 6: Relationship between Ki67 status and Nottingham Prognostic Index (NPI)**

|                                 | Ki67 high expression <i>n</i><br>(%) | Ki67 low expression <i>n</i><br>(%) | <i>X</i> <sup>2</sup> | <i>P</i> |
|---------------------------------|--------------------------------------|-------------------------------------|-----------------------|----------|
| <b>NPI score</b>                |                                      |                                     | 9.402                 | 0.009    |
| 2.00–3.40                       | 196 (41.7)                           | 61 (58.1)                           |                       |          |
| 3.41–5.40                       | 241 (51.3)                           | 38 (36.2)                           |                       |          |
| > 5.40                          | 33 (7.0)                             | 6 (5.7)                             |                       |          |
| <b>Grade</b>                    |                                      |                                     | 23.322                | 0.000    |
| High histological grade         | 62 (13.8)                            | 5 (5.1)                             |                       |          |
| Intermediate histological grade | 338 (75.3)                           | 66 (66.7)                           |                       |          |
| Low histological grade          | 49 (10.9)                            | 28 (28.3)                           |                       |          |
| <b>Tumor size</b>               |                                      |                                     | 5.723                 | 0.126    |
| T1                              | 223 (40.6)                           | 71 (50.1)                           |                       |          |
| T2                              | 286 (52.1)                           | 58 (40.8)                           |                       |          |
| T3                              | 19 (3.5)                             | 6 (4.2)                             |                       |          |
| T4                              | 21 (3.8)                             | 7 (4.9)                             |                       |          |
| <b>Lymph nodes</b>              |                                      |                                     | 1.848                 | 0.397    |
| N0                              | 266 (59.4)                           | 54 (61.4)                           |                       |          |
| N1                              | 181 (40.4)                           | 33 (37.5)                           |                       |          |
| N2                              | 1 (0.2)                              | 1 (1.1)                             |                       |          |

statistically significant ( $P = 0.009$ ;  $P < 0.001$ ). However, there was no significant difference in the tumor size or lymph nodes staging between Ki67 high expression and low expression groups. (Table 6 and Figure 1)

### Clinicopathological data for the entire patient cohorts

All clinicopathological data could be obtained from Supplementary Tables 1–3.

## DISCUSSION

Breast cancer is classified into four molecular subtypes according to the expression of ER, PR, HER2 and Ki67. Molecular subtypes as new prognostic indicators have been received more and more attention. In these molecular subtypes, Luminal A subtype shows the best outcome, whereas, HER2 overexpression and basal-like subtypes present the poorer outcome [15–20]. Breast cancer patients with the same clinical prognostic profile may have markedly different outcomes, which are concrete manifestations of distinct molecular biology behavior [21]. Traditional clinicopathological parameters including positive margin, vascular tumor invasion, histological grade, lymph node staging and tumor size have been verified as independent risk factors for recurrence [22–27]. NPI combines the number of involved lymph nodes, tumor size and histological grade to determine prognosis, it is a well-established clinicopathological

score system which offers comprehensive prognostic information than single marker [28, 29]. The markers involving in molecular subtypes and NPI are completely different, however, both are used to guide treatment and predict prognosis. Whether the novelty molecular subtypes could completely substitute the traditional clinicopathological prognostic markers is a question worthy of consideration, and whether traditional NPI provide more detailed stratification in every molecular subtypes is another question worthy of in-depth research. However, the correlation and inherent link between the molecular subtypes and NPI have rarely been reported. The in-depth understanding of the association between the two classifications will help us to choose the precise prognostic markers in clinical practice.

In this study, we conducted a comprehensive analysis on the relationship between the molecular subtypes and NPI in breast cancer. The overall analysis confirmed that the molecular subtypes were significantly correlated with the traditional NPI score, the molecular subtypes indicating poorer prognosis were positively correlated to higher NPI score. ER+ and PR+ as good prognostic indicators positively correlated with NPI scores and negatively correlated with histological grade. Ki67 as proliferation indicator negatively correlated with NPI scores and positively correlated with pathological grade. Higher percentages of NPI score 2.00–3.40 were seen in the luminal A, ER+, PR high expression and Ki67 low expression group, and higher percentages of NPI > 5.40 were seen in the ER-, PR low/negative expression and Ki67 high expression groups. There had

excellent consistence between NPI, histological grade and molecular subtypes, ER, PR and Ki67. The study of Kurshumliu F demonstrated that good prognosis markers, such as ER positive expression, PR positive expression and Ki-67 low expression, were seen with higher frequency in good and moderate NPI groups [4]. This was consistent with our findings.

Specimens that display a basal-like cell phenotype features are also called, in routine practice, as triple negative breast cancer (TNBC). It represents an easily recognizable breast cancer group with aggressive behavior [30]. TNBC are shown to have an attenuated relationship between tumor size, nodal status, and survival. It is currently accepted that TNBC is more prone to haematogenous metastasis rather than lymph node metastasis [31]. Since lymph nodal is a major component for NPI calculation, there are concerns about the reliability of using NPI as a tool for TNBC prognostication. However, Dent R reported a higher prevalence of lymph node metastasis in TNBC [32], and Albergaria A had demonstrated that TNBC disseminated to axillary lymph nodes as frequently as other subtypes, it had the ability to predict the survival of TNBC, and NPI was a truthful prognostic tool in TNBC [6]. In our study, the proportion of N1+N2 in basal-like subtype was almost the same as that in other subtypes.

Tumor size is another major component of NPI. Generally speaking, it is independent risk factor for recurrence [27]. In our study, the percents of T2 were significant higher than percentages of T1 in basal-like subtype group, ER negative group, PR negative/low expression group. However, the same trend was not observed in HER2 over expression group and HER2 positive group. One study reported that there was an increased tumor size for the ER-/PR-/HER2+ and ER-/PR-/HER2- subtypes, however, Foulkes WD proposed that basal-like breast cancers and HER2 positive breast cancer were inherently aggressive and were likely to early metastasize, tumor size might not be related to the prognosis [33, 34]. Cheang MC put forward that the special type (ER-/PR-/HER2-/cytokeratin 5+ and/or EGFR+) of basal-like breast cancers might have cancer stem-like properties and the strong tendency to metastasize early [35]. These maybe lead to some conflict results about tumor size and outcome in the breast cancers.

In conclusion, there is closely association between molecular subtypes and NPI in breast cancer. For further comparing the prognostic significance of molecular subtypes and NPI, survival analyses should be performed on the same population in a large-scale prospective study. Moreover, it is necessary to evaluate the prognostic significance of NPI in different molecular subgroups or the additional value of intrinsic molecular classification to different NPI score. Different prognostic models have their one-sidedness, and the comprehensive analysis will better guide the clinician to judge the prognosis.

## MATERIALS AND METHODS

### Study population

During the period between January 2008 and December 2012, a total of 1,042 patients with operable breast cancer were enrolled in the study, and average age  $\pm$  standard deviation was  $55.56 \pm 12.37$  years (range, 22 to 92 years). All patients were either from the Department of Breast Surgery or Department of Oncology. Biopsies or surgical resection specimens were pathologically examined and histologically confirmed. Complete pathological records were available, and the following details were recorded: tumor size (T), the number of positive lymph nodes (N), histological tumor grade (G), histopathological type, ER, PR, Ki67 and HER2 status. All patients were not treated with radiation before operation. The patients with the history of other malignant disease and recurrent malignancies were excluded. Patients who had neoadjuvant chemotherapy were not excluded because the NPI retained its prognostic value after this form of treatment [36]. The research was reviewed and approved by the Ethics Committee of Beijing Friendship Hospital in China. All procedures performed in the study involving human participants were in accordance with the ethical standards of the Beijing Friendship Hospital, Capital Medical University and/or national research committee and with the 1964 Helsinki declaration and its later amendments or comparable ethical standards. Before collecting human samples, all participants signed informed consent forms according to our institutional guidelines.

### Traditional histological characteristics

T, N, G and histopathological type were collected and classified according to the American Joint Committee on Cancer TNM Staging System for Breast Cancer (National Comprehensive Cancer Network Guidelines Version 2.2016 for Breast Cancer). G analysis was centrally performed on whole sections according to the recommendations of Nottingham combined with histological grade (Elston-Ellis modification of Scarff-Bloom-Richardson grading system), also known as the Nottingham Grading System.

### Scoring for immunohistochemistry (IHC)

ER, PR and Ki67 status were determined by immunohistochemical staining. Qualitative scoring of ER and PR was performed using ASCO/CAP criteria, and an IHC scoring was used as follows: +, total score 3–4; ++, total score 5–6; +++, total score 7–8. Tumors were considered HER2 positive if scored 3+ by immunohistochemical staining or 2+ by immunohistochemical staining and also HER2 amplified (ratio > 2.0) on the basis of fluorescence *in situ* hybridization. In the absence of positive fluorescence

**Table 7: Surrogate definitions of molecular subtypes of breast cancer**

| Molecular Subtypes                   | Luminal A                                                                                                                          | Luminal B                                                                                                                                                                                                                      | HER2 overexpression                                                                                                                  | Basal-like                                                                                                                        |
|--------------------------------------|------------------------------------------------------------------------------------------------------------------------------------|--------------------------------------------------------------------------------------------------------------------------------------------------------------------------------------------------------------------------------|--------------------------------------------------------------------------------------------------------------------------------------|-----------------------------------------------------------------------------------------------------------------------------------|
| histopathologic surrogate definition | <ul style="list-style-type: none"> <li>• ER-positive</li> <li>• HER2-negative</li> <li>• Ki67 low*</li> <li>• PR high**</li> </ul> | <ul style="list-style-type: none"> <li>• HER2-negative</li> <li>• ER-positive</li> <li>• HER2-negative</li> <li>• and either <ul style="list-style-type: none"> <li>• Ki67 high** or</li> <li>• PR low*</li> </ul> </li> </ul> | <ul style="list-style-type: none"> <li>• HER2-positive (non-luminal)</li> <li>• HER2-positive</li> <li>• ER and PR absent</li> </ul> | <ul style="list-style-type: none"> <li>• Triple-negative (ductal)</li> <li>• ER and PR absent</li> <li>• HER2-negative</li> </ul> |
|                                      |                                                                                                                                    | <ul style="list-style-type: none"> <li>• HER2-positive</li> <li>• ER-positive</li> <li>• HER2-positive</li> <li>• any Ki67</li> <li>• any PR</li> </ul>                                                                        |                                                                                                                                      |                                                                                                                                   |

Notes: \*The cut-off point between high and low values for Ki-67 varies among laboratories. \*\*Suggested cut-off values for both PR and Ki-67 are 20%. Abbreviations: ER, oestrogen receptor; PR, progesterone receptor; HER2, human epidermal growth factor receptor 2.

*in situ* hybridization data, tumors scored 2+ by immunohistochemical staining were considered negative for HER2.

### Definitions for molecular subtypes of breast cancer

Four molecular subtypes (luminal A, luminal B, HER2-overexpression and basal-like) were classified. Table 7 was surrogate definitions of molecular subtypes of breast cancer according to the 2013 St Gallen Consensus Conference and ESMO Clinical Practice Guidelines.

### NPI scoring

Whenever possible, NPI was calculated for each patient using the following equation:  $NPI = (0.2 \times S) + G + N$  [37]. In this formula, S is the tumor size in cm, N is the number of involved lymph nodes ( $>4 = 3$ ,  $4-1 = 2$ ,  $0 = 1$ ), and G is the degree of malignancy of the tumor (degree 3 = 3, degree 2 = 2, degree 1 = 1). All patients were assigned into one of the three different prognosis groups: good, 2.00–3.40; moderate, 3.41–5.40; poor prognostic,  $> 5.40$  [3].

### Statistical analysis

All analysis was performed using the SPSS 13.0 software (SPSS Inc., Chicago, Illinois, USA). The categorical variables were described using numbers and percentage. The correlation analysis of the categorical variables was analyzed by Spearman correlation analysis.

The relationships between molecular subtypes and NPI were evaluated using Chi-square test. A two sided *P* value less than 0.05 was considered to be statistically significant.

### Abbreviations

NPI, Nottingham Prognostic Index; ER, estrogen receptor; PR, progesterone receptor; HER2, human epidermal growth factor receptor 2; TNBC, triple negative breast cancers.

### Authors' contributions

Qin Li contributed to the design of the study. Hongchao Zhen, Liuting Yang and Junxian Yu collected the clinical and pathological data. Li Li and Lei Zhao were responsible for the statistical analysis. Hongchao Zhen wrote the main manuscript and prepared tables. All authors contributed to the review, edited and approved of the paper. All authors agreed to be accountable for the content of this paper.

### CONFLICTS OF INTEREST

The authors declare no financial or commercial conflicts of interest.

### FUNDING

This study was funded by the National Natural Science Foundation of China (Grant NO. 81301912 and



81272615), Beijing Municipal Health System High-level Health Person Foundation Project (Grant NO. 2014-3-005), and the Beijing Municipal Science and Technology Commission Foundation (Capital Features, Z161100000516083, to Qin Li).

## REFERENCES

1. Ghoncheh M, Pournamdar Z, Salehiniya H. Incidence and Mortality and Epidemiology of Breast Cancer in the World. *Asian Pac J Cancer Prev*. 2016; 17:43–46.
2. Todd JH, Dowle C, Williams MR, Elston CW, Ellis IO, Hinton CP, Blamey RW, Haybittle JL. Confirmation of a prognostic index in primary breast cancer. *Br J Cancer*. 1987; 56:489–492.
3. Rakha EA, Soria D, Green AR, Lemetre C, Powe DG, Nolan CC, Garibaldi JM, Ball G, Ellis IO. Nottingham Prognostic Index Plus (NPI+): a modern clinical decision making tool in breast cancer. *Br J Cancer*. 2014; 110:1688–1697.
4. Kurshumliu F, Gashi-Luci L, Kadare S, Alimehmeti M, Gozalan U. Classification of patients with breast cancer according to Nottingham prognostic index highlights significant differences in immunohistochemical marker expression. *World J Surg Oncol*. 2014; 12: 243.
5. Rejali M, Tazhibi M, Mokarian F, Gharanjik N, Mokarian R. The Performance of the Nottingham Prognosis Index and the Adjuvant Online Decision Making Tool for Prognosis in Early-stage Breast Cancer Patients. *Int J Prev Med*. 2015; 6: 93.
6. Albergaria A, Ricardo S, Milanezi F, Carneiro V, Amendoeira I, Vieira D, Cameselle-Teijeiro J, Schmitt F. Nottingham Prognostic Index in triple-negative breast cancer: a reliable prognostic tool? *BMC Cancer*. 2011; 11:299.
7. King TA, Lyman JP, Gonen M, Voci A, De Brot M, Boafco C, Sing AP, Hwang ES, Alvarado MD, Liu MC, Boughey JC, McGuire KP, Van Poznak CH, et al. Prognostic Impact of 21-Gene Recurrence Score in Patients With Stage IV Breast Cancer: TBCRC 013. *J Clin Oncol*. 2016; 34:2359–2365.
8. Kuijter A, van Bommel AC, Drukker CA, van der Heiden-van der Loo M, Smorenburg CH, Westenend PJ, Linn SC, Rutgers EJ, Elias SG, van Dalen T. Using a gene expression signature when controversy exists regarding the indication for adjuvant systemic treatment reduces the proportion of patients receiving adjuvant chemotherapy: a nationwide study. *Genet Med*. 2016; 18:720–726.
9. Gyorfy B, Bottai G, Lehmann-Che J, Keri G, Orfi L, Iwamoto T, Desmedt C, Bianchini G, Turner NC, de The H, Andre F, Sotiriou C, Hortobagyi GN, et al. TP53 mutation-correlated genes predict the risk of tumor relapse and identify MPS1 as a potential therapeutic kinase in TP53-mutated breast cancers. *Mol Oncol*. 2014; 8:508–519.
10. Epstein AJ, Wong YN, Mitra N, Vachani A, Hin S, Yang L, Smith-McLallen A, Armstrong K, Groeneveld PW. Adjuvant Chemotherapy Use and Health Care Costs After Introduction of Genomic Testing in Breast Cancer. *J Clin Oncol*. 2015; 33:4259–4267.
11. Goldhirsch A, Winer EP, Coates AS, Gelber RD, Piccart-Gebhart M, Thurlimann B, Senn HJ, Panel members. Personalizing the treatment of women with early breast cancer: highlights of the St Gallen International Expert Consensus on the Primary Therapy of Early Breast Cancer 2013. *Ann Oncol*. 2013; 24:2206–2223.
12. Koornstra RH, Beelen KJ, Vincent AD, van der Noort V, van Diest PJ, Linn SC. St. Gallen endocrine response classes predict recurrence rates over time. *Breast*. 2015; 24:705–712.
13. Creighton CJ. The molecular profile of luminal B breast cancer. *Biologics*. 2012; 6:289–297.
14. Harbeck N, Thomssen C, Gnant M. St. Gallen 2013: brief preliminary summary of the consensus discussion. *Breast Care (Basel)*. 2013; 8:102–109.
15. Inic Z, Zegarac M, Inic M, Markovic I, Kozomara Z, Djuricic I, Inic I, Pupic G, Jancic S. Difference between Luminal A and Luminal B Subtypes According to Ki-67, Tumor Size, and Progesterone Receptor Negativity Providing Prognostic Information. *Clin Med Insights Oncol*. 2014; 8:107–111.
16. Garcia Fernandez A, Chabrera C, Garcia Font M, Fraile M, Lain JM, Gonzalez S, Barco I, Gonzalez C, Torres J, Piqueras M, Cirera L, Veloso E, Pessarrodona A, et al. Differential patterns of recurrence and specific survival between luminal A and luminal B breast cancer according to recent changes in the 2013 St Gallen immunohistochemical classification. *Clin Transl Oncol*. 2015; 17:238–246.
17. Engstrom MJ, Opdahl S, Hagen AI, Romundstad PR, Akslen LA, Haugen OA, Vatten LJ, Bofin AM. Molecular subtypes, histopathological grade and survival in a historic cohort of breast cancer patients. *Breast Cancer Res Treat*. 2013; 140:463–473.
18. Voduc KD, Cheang MC, Tyldesley S, Gelmon K, Nielsen TO, Kennecke H. Breast cancer subtypes and the risk of local and regional relapse. *J Clin Oncol*. 2010; 28:1684–1691.
19. Li X, Yang J, Peng L, Sahin AA, Huo L, Ward KC, O'Regan R, Torres MA, Meisel JL. Triple-negative breast cancer has worse overall survival and cause-specific survival than non-triple-negative breast cancer. *Breast Cancer Res Treat*. 2017; 161:279–287.
20. Lowery AJ, Kell MR, Glynn RW, Kerin MJ, Sweeney KJ. Locoregional recurrence after breast cancer surgery: a systematic review by receptor phenotype. *Breast Cancer Res Treat*. 2012; 133:831–841.
21. Garcia Fernandez A, Gimenez N, Fraile M, Gonzalez S, Chabrera C, Torras M, Gonzalez C, Salas A, Barco I, Cirera L, Cambra MJ, Veloso E, Pessarrodona A. Survival and clinicopathological characteristics of breast cancer patient according to different tumour subtypes as determined by hormone receptor and Her2 immunohistochemistry. a single institution survey spanning 1998 to 2010. *Breast*. 2012; 21:366–373.

22. Voguet L, Hebert T, Leveque J, Acker O, Mesbah H, Marret H, Poree P, Body G. Patient age and positive margins are predictive factors of residual tumor on mastectomy specimen after conservative treatment for breast cancer. *Breast*. 2009; 18:233–237.
23. Houssami N, Macaskill P, Marinovich ML, Morrow M. The association of surgical margins and local recurrence in women with early-stage invasive breast cancer treated with breast-conserving therapy: a meta-analysis. *Ann Surg Oncol*. 2014; 21:717–730.
24. Kurz C, Obermair A, Nagele F, Czerwenka K, Schemper M, Kubista E, Sevelde P. [The value of the “vascular invasion” factor for prognosis of breast cancer]. [Article in German]. *Geburtshilfe Frauenheilkd*. 1994; 54:295–299.
25. Solak M, Turkoz FP, Keskin O, Aksoy S, Babacan T, Sarici F, Kertmen N, Sever AR, Altundag K. The lymph node ratio as an independent prognostic factor for non-metastatic node-positive breast cancer recurrence and mortality. *J BUON*. 2015; 20:737–745.
26. Contesso G, Mouriessse H, Friedman S, Genin J, Sarrazin D, Rouesse J. The importance of histologic grade in long-term prognosis of breast cancer: a study of 1,010 patients, uniformly treated at the Institut Gustave-Roussy. *J Clin Oncol*. 1987; 5:1378–1386.
27. Fei F, Messina C, Slaets L, Chakiba C, Cameron D, Bogaerts J, Bonnefoi H. Tumour size is the only predictive factor of distant recurrence after pathological complete response to neoadjuvant chemotherapy in patients with large operable or locally advanced breast cancers: a sub-study of EORTC 10994/BIG 1-00 phase III trial. *Eur J Cancer*. 2015; 51:301–309.
28. Winzer KJ, Buchholz A, Schumacher M, Sauerbrei W. Improving the Prognostic Ability through Better Use of Standard Clinical Data-The Nottingham Prognostic Index as an Example. *PLoS One*. 2016; 11:e0149977.
29. Green AR, Soria D, Powe DG, Nolan CC, Aleskandarany M, Szasz MA, Tokes AM, Ball GR, Garibaldi JM, Rakha EA, Kulka J, Ellis IO. Nottingham prognostic index plus (NPI+) predicts risk of distant metastases in primary breast cancer. *Breast Cancer Res Treat*. 2016; 157:65–75.
30. Joyce DP, Murphy D, Lowery AJ, Curran C, Barry K, Malone C, McLaughlin R, Kerin MJ. Prospective comparison of outcome after treatment for triple-negative and non-triple-negative breast cancer. *Surgeon*. 2016 Oct 27. [Epub ahead of print] <http://dx.doi.org/10.1016/j.surge.2016.10.001>.
31. Lin NU, Vanderplas A, Hughes ME, Theriault RL, Edge SB, Wong YN, Blayney DW, Niland JC, Winer EP, Weeks JC. Clinicopathologic features, patterns of recurrence, and survival among women with triple-negative breast cancer in the National Comprehensive Cancer Network. *Cancer*. 2012; 118:5463–5472.
32. Dent R, Hanna WM, Trudeau M, Rawlinson E, Sun P, Narod SA. Pattern of metastatic spread in triple-negative breast cancer. *Breast Cancer Res Treat*. 2009; 115:423–428.
33. Foulkes WD, Grainge MJ, Rakha EA, Green AR, Ellis IO. Tumor size is an unreliable predictor of prognosis in basal-like breast cancers and does not correlate closely with lymph node status. *Breast Cancer Res Treat*. 2009; 117:199–204.
34. Foulkes WD. Size surprise? Tumour size, nodal status, and outcome after breast cancer. *Curr Oncol*. 2012; 19:241–243.
35. Cheang MC, Voduc D, Bajdik C, Leung S, McKinney S, Chia SK, Perou CM, Nielsen TO. Basal-like breast cancer defined by five biomarkers has superior prognostic value than triple-negative phenotype. *Clin Cancer Res*. 2008; 14:1368–1376.
36. Chollet P, Amat S, Belembaogo E, Cure H, de Latour M, Dauplat J, Le Bouedec G, Mouret-Reynier MA, Ferriere JP, Penault-Llorca F. Is Nottingham prognostic index useful after induction chemotherapy in operable breast cancer? *Br J Cancer*. 2003; 89:1185–1191.
37. Galea MH, Blamey RW, Elston CE, Ellis IO. The Nottingham Prognostic Index in primary breast cancer. *Breast Cancer Res Treat*. 1992; 22:207–219.
