# Supplementary material for: Correlation analysis between molecular subtypes and Nottingham Prognostic Index in breast cancer
Source: PubMed Central journal article supplement (PMC5650325; doi:10.18632/oncotarget.18242), 2017-05-27
Supplement: oncotarget-08-74096-s001.pdf [file oncotarget-08-74096-s001.pdf]

## Correlation analysis between molecular subtypes and Nottingham Prognostic Index in breast cancer

### Supplementary Materials

**Supplementary Table 1: Clinicopathological data for the entire patients cohorts**

|                                 | Luminal A<br>(n = 109) | Luminal B<br>(n = 565) | HER2<br>overexpression<br>(n = 85) | Basal-like<br>(n = 117) | Unclassified<br>(n = 166) |
|---------------------------------|------------------------|------------------------|------------------------------------|-------------------------|---------------------------|
|                                 | n%                     | n%                     | n%                                 | n%                      | n%                        |
| <b>NPI score</b>                |                        |                        |                                    |                         |                           |
| 2.00-3.40                       | 39 (35.8)              | 183 (32.4%)            | 16 (18.8%)                         | 30 (25.6%)              | 44 (26.5%)                |
| 3.41-5.40                       | 25 (22.9)              | 190 (33.6%)            | 27 (31.8%)                         | 47 (40.2%)              | 37 (22.3%)                |
| >5.40                           | 3 (2.8%)               | 23 (4.1%)              | 5 (5.9%)                           | 8 (6.8%)                | 6 (3.6%)                  |
| Absent                          | 42 (38.5%)             | 169 (29.9%)            | 37 (43.5%)                         | 32 (27.4%)              | 79 (47.6%)                |
| <b>Grade</b>                    |                        |                        |                                    |                         |                           |
| High histological grade         | 3 (2.8)                | 36 (6.4%)              | 9 (10.6%)                          | 22 (18.8%)              | 6 (3.6%)                  |
| Intermediate histological grade | 42 (38.5)              | 293 (51.9%)            | 31 (36.5%)                         | 51 (43.6%)              | 61 (36.8%)                |
| Low histological grade          | 17 (15.6)              | 50 (8.8%)              | 6 (7.0%)                           | 6 (5.1%)                | 10 (6.0%)                 |
| Absent                          | 47 (43.1)              | 186 (32.9%)            | 39 (45.9%)                         | 38 (32.5%)              | 89 (53.6%)                |
| <b>Tumor size</b>               |                        |                        |                                    |                         |                           |
| T1                              | 39 (35.8%)             | 198 (35.0%)            | 29 (34.1%)                         | 38 (32.5%)              | 47 (28.3%)                |
| T2                              | 37 (33.9%)             | 237 (41.9%)            | 27 (31.8%)                         | 55 (47.0%)              | 64 (38.6%)                |
| T3                              | 5 (4.6%)               | 12 (2.1%)              | 6 (7.1%)                           | 2 (1.7%)                | 7 (4.2%)                  |
| T4                              | 6 (5.5%)               | 20 (3.6%)              | 3 (3.5%)                           | 2 (1.7%)                | 5 (3.0%)                  |
| TX                              | 22 (20.2%)             | 98 (17.3%)             | 20 (23.5%)                         | 20 (17.1%)              | 43 (25.9%)                |
| <b>Lymph nodes</b>              |                        |                        |                                    |                         |                           |
| N0                              | 38 (34.9%)             | 220 (38.9%)            | 30 (35.3%)                         | 51 (43.6%)              | 69 (41.5%)                |
| N1                              | 22 (20.2%)             | 152 (26.9%)            | 16 (18.8%)                         | 28 (23.9%)              | 32 (19.3%)                |
| N2                              | 0 (0.0%)               | 2 (0.4%)               | 0 (0.0%)                           | 0 (0.0%)                | 0 (0.0%)                  |
| NX                              | 49 (45.0%)             | 191 (33.8%)            | 39 (45.9%)                         | 38 (32.5%)              | 65 (39.2%)                |

Abbreviation: NR = not reach.

**Supplementary Table 2: Clinicopathological data for the entire patients cohorts**

|                                 | ER positive<br>(n = 670) | ER<br>negative<br>(n = 216) | ER-NR<br>(n = 156) | PR high<br>expression<br>(n = 456) | PR low<br>expression<br>(n = 105) | PR negative<br>(n = 314) | PR-NR<br>(n = 167) |
|---------------------------------|--------------------------|-----------------------------|--------------------|------------------------------------|-----------------------------------|--------------------------|--------------------|
|                                 | n%                       | n%                          | n%                 | n%                                 | n%                                | n%                       | n%                 |
| <b>NPI score</b>                |                          |                             |                    |                                    |                                   |                          |                    |
| 2.00–3.40                       | 221 (33.0%)              | 46 (21.2%)                  | 45 (28.8%)         | 157 (34.3%)                        | 33 (31.4%)                        | 78 (24.8%)               | 44 (26.3%)         |
| 3.41–5.40                       | 208 (31.0%)              | 80 (37.0%)                  | 38 (24.5%)         | 138 (30.3%)                        | 28 (26.7%)                        | 122 (38.9%)              | 38 (22.8%)         |
| > 5.40                          | 25 (3.7%)                | 14 (6.5%)                   | 6 (3.8%)           | 13 (2.9%)                          | 11 (10.5%)                        | 15 (4.8%)                | 6 (3.6%)           |
| Absent                          | 216 (32.3%)              | 76 (35.2%)                  | 67 (42.9%)         | 148 (32.5%)                        | 33 (31.4%)                        | 99 (31.5%)               | 79 (47.3%)         |
| <b>Grade</b>                    |                          |                             |                    |                                    |                                   |                          |                    |
| High histological grade         | 32 (4.8%)                | 39 (18.1%)                  | 5 (3.2%)           | 18 (3.9%)                          | 11 (10.5%)                        | 41 (13.1%)               | 6 (3.6%)           |
| Intermediate histological grade | 332 (49.6%)              | 83 (38.3%)                  | 63 (40.2%)         | 232 (50.9%)                        | 47 (44.7%)                        | 137 (43.6%)              | 62 (37.1%)         |
| Low histological grade          | 68 (10.1%)               | 12 (5.6%)                   | 9 (5.8%)           | 47 (10.3%)                         | 11 (10.5%)                        | 21 (6.7%)                | 10 (6.0%)          |
| Absent                          | 238 (35.5%)              | 82 (38.0%)                  | 79 (50.6%)         | 159 (34.9%)                        | 36 (34.3%)                        | 115 (36.6%)              | 89 (53.3%)         |
| <b>Tumor size</b>               |                          |                             |                    |                                    |                                   |                          |                    |
| T1                              | 238 (35.5%)              | 68 (31.5%)                  | 45 (28.8%)         | 172 (37.7%)                        | 31 (29.4%)                        | 101 (32.2%)              | 47 (28.2%)         |
| T2                              | 269 (40.1%)              | 89 (41.2%)                  | 62 (39.7%)         | 171 (37.5%)                        | 51 (48.6%)                        | 136 (43.3%)              | 62 (37.1%)         |
| T3                              | 16 (2.4%)                | 9 (4.2%)                    | 7 (4.5%)           | 13 (2.9%)                          | 1 (1.0%)                          | 11 (3.5%)                | 7 (4.2%)           |
| T4                              | 26 (3.9%)                | 5 (2.3%)                    | 5 (3.3%)           | 17 (3.7%)                          | 5 (4.8%)                          | 9 (2.8%)                 | 5 (3.0%)           |
| TX                              | 121 (18.1%)              | 45 (20.8%)                  | 37 (23.7%)         | 83 (18.2%)                         | 17 (16.2%)                        | 57 (18.2%)               | 46 (27.5%)         |
| <b>Lymph nodes</b>              |                          |                             |                    |                                    |                                   |                          |                    |
| N0                              | 256 (38.2%)              | 85 (39.3%)                  | 67 (42.9%)         | 169 (37.1%)                        | 44 (41.9%)                        | 126 (40.1%)              | 69 (41.3%)         |
| N1                              | 170 (25.4%)              | 47 (21.8%)                  | 33 (21.2%)         | 114 (25.0%)                        | 29 (27.6%)                        | 74 (23.6%)               | 33 (19.8%)         |
| N2                              | 2 (0.3%)                 | 0 (0.0%)                    | 0 (0.0%)           | 0 (0.0%)                           | 1 (1.0%)                          | 1 (0.3%)                 | 0 (0.0%)           |
| NX                              | 242 (36.1%)              | 84 (38.9%)                  | 56 (35.9%)         | 173 (37.9%)                        | 31 (29.5%)                        | 113 (36.0%)              | 65 (38.9%)         |

Abbreviation: NR = not reach

**Supplementary Table 3: Clinicopathological data for the entire patients cohorts**

|                                 | <b>HER2<br/>positive<br/>(n = 196)</b> | <b>HER2<br/>negative<br/>(n = 627)</b> | <b>HER2-NR<br/>(n = 219)</b> | <b>Ki67 high<br/>expression<br/>(n = 653)</b> | <b>Ki67 low<br/>expression<br/>(n = 170)</b> | <b>Ki67-NR<br/>(n = 219)</b> |
|---------------------------------|----------------------------------------|----------------------------------------|------------------------------|-----------------------------------------------|----------------------------------------------|------------------------------|
|                                 | <i>n%</i>                              | <i>n%</i>                              | <i>n%</i>                    | <i>n%</i>                                     | <i>n%</i>                                    | <i>n%</i>                    |
| <b>NPI score</b>                |                                        |                                        |                              |                                               |                                              |                              |
| 2.00-3.40                       | 60 (30.6%)                             | 198 (31.6%)                            | 54 (24.7%)                   | 196 (30.0%)                                   | 61 (35.9%)                                   | 55 (25.1%)                   |
| 3.41-5.40                       | 66 (33.7%)                             | 217 (34.6%)                            | 43 (19.6%)                   | 241 (36.9%)                                   | 38 (22.4%)                                   | 47 (21.5%)                   |
| >5.40                           | 9 (4.6%)                               | 30 (4.8%)                              | 6 (2.7%)                     | 33 (5.1%)                                     | 6 (3.5%)                                     | 6 (2.7%)                     |
| Absent                          | 61 (31.1%)                             | 182 (29.0%)                            | 116 (53.0%)                  | 183 (28.0%)                                   | 65 (38.2%)                                   | 111 (50.7%)                  |
| <b>Grade</b>                    |                                        |                                        |                              |                                               |                                              |                              |
| High histological grade         | 13 (6.6%)                              | 55 (8.8%)                              | 8 (3.7%)                     | 62 (9.5%)                                     | 5 (2.9%)                                     | 9 (4.1%)                     |
| Intermediate histological grade | 110 (56.1%)                            | 300 (47.8%)                            | 68 (31.1%)                   | 338 (51.8%)                                   | 66 (38.8%)                                   | 74 (33.8%)                   |
| Low histological grade          | 7 (3.6%)                               | 67 (10.7%)                             | 15 (6.8%)                    | 49 (7.5%)                                     | 28 (16.5%)                                   | 12 (5.5%)                    |
| Absent                          | 66 (33.7%)                             | 205 (32.7%)                            | 128 (58.4%)                  | 204 (31.2%)                                   | 71 (41.8%)                                   | 124 (56.6%)                  |
| <b>Tumor size</b>               |                                        |                                        |                              |                                               |                                              |                              |
| T1                              | 72 (36.7%)                             | 217 (34.6%)                            | 62 (28.3%)                   | 223 (34.2%)                                   | 71 (41.8%)                                   | 57 (26.0%)                   |
| T2                              | 74 (37.8%)                             | 267 (42.6%)                            | 79 (36.1%)                   | 286 (43.8%)                                   | 58 (34.1%)                                   | 76 (34.7%)                   |
| T3                              | 10 (5.1%)                              | 15 (2.4%)                              | 7 (3.2%)                     | 19 (2.9%)                                     | 6 (3.5%)                                     | 7 (3.2%)                     |
| T4                              | 4 (2.0%)                               | 24 (3.8%)                              | 8 (3.7%)                     | 21 (3.2%)                                     | 7 (4.1%)                                     | 8 (3.7%)                     |
| TX                              | 36 (18.4%)                             | 104 (16.6%)                            | 63 (28.7%)                   | 104 (15.9%)                                   | 28 (16.5%)                                   | 71 (32.4%)                   |
| <b>Lymph nodes</b>              |                                        |                                        |                              |                                               |                                              |                              |
| N0                              | 74 (37.8%)                             | 252 (40.2%)                            | 82 (37.4%)                   | 266 (40.7%)                                   | 54 (31.8%)                                   | 88 (40.2%)                   |
| N1                              | 49 (25.0%)                             | 166 (26.5%)                            | 35 (16.0%)                   | 181 (27.7%)                                   | 33 (19.4%)                                   | 36 (16.4%)                   |
| N2                              | 0 (0.0%)                               | 2 (0.3%)                               | 0 (0.00)                     | 1 (0.2%)                                      | 1 (0.6%)                                     | 0 (0.0%)                     |
| NX                              | 73 (37.2%)                             | 207 (33.0%)                            | 102 (46.6%)                  | 205 (31.4%)                                   | 82 (48.2%)                                   | 95 (43.4%)                   |

Abbreviation:NR = not reach
